# Supplementary material for: In vitro magnetic hyperthermia properties of angle-shaped superparamagnetic iron oxide nanoparticles synthesized by a bromide-assisted polyol method
Source: Royal Society of Chemistry journal article supplement (doi:10.1039/d2ra07190h), 2023-01-01
Supplement: d2ra07190h1.pdf [file d2ra07190h1.pdf]

## Supporting Information

### ***In vitro* magnetic hyperthermia properties of angle-shaped superparamagnetic iron oxide nanoparticles synthesized by bromide-assisted polyol method**

Hoonsub Kim,<sup>‡a</sup> Pyung Won Im,<sup>‡b</sup> Chaedong Lee,<sup>a</sup> Hwicheon Hong,<sup>a</sup> Wooseung Lee,<sup>a</sup> Changhyuk Koo,<sup>a</sup> Sang Yoon Park,<sup>c</sup> Hyung-Jun Im,<sup>\*abc</sup> Sun Ha Paek,<sup>\*bcd</sup> and Yuanzhe Piao<sup>\*ae</sup>

<sup>a</sup> Department of Applied Bioengineering, Graduate School of Convergence Science and Technology, Seoul National University, Suwon-si, Gyeonggi-do, 16229, Republic of Korea. E-mail : [iihjij@snu.ac.kr](mailto:iihjij@snu.ac.kr)

<sup>b</sup> Cancer Research Institute, Seoul National University, Seoul, 03080, Republic of Korea. E-mail : [paeksh@snu.ac.kr](mailto:paeksh@snu.ac.kr)

<sup>c</sup> Department of Molecular Medicine and Biopharmaceutical Sciences, Graduate School of Convergence Science and Technology, Seoul National University, Seoul 08826, Republic of Korea.

<sup>d</sup> Department of Neurosurgery, Hypoxia/Ischemia Disease Institute, Seoul National University, Seoul 03080, Republic of Korea.

<sup>e</sup> Advanced Institutes of Convergence Technology, Suwon-si, Gyeonggi-do, 16229, Republic of Korea. E-mail : [parkat9@snu.ac.kr](mailto:parkat9@snu.ac.kr); Tel : +82 31 888 9141

<sup>‡</sup> These authors contributed equally.

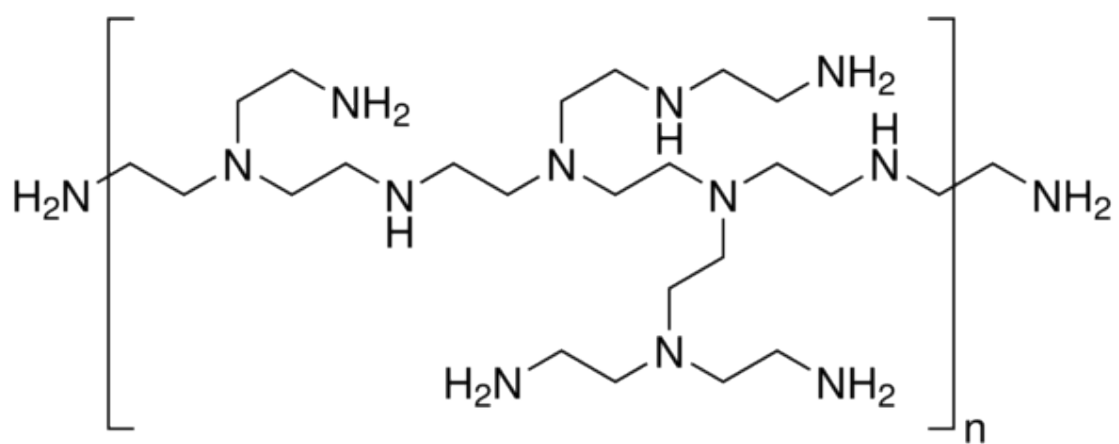

**Fig. S1** Chemical structure of branched polyethyleneimine (b-PEI).

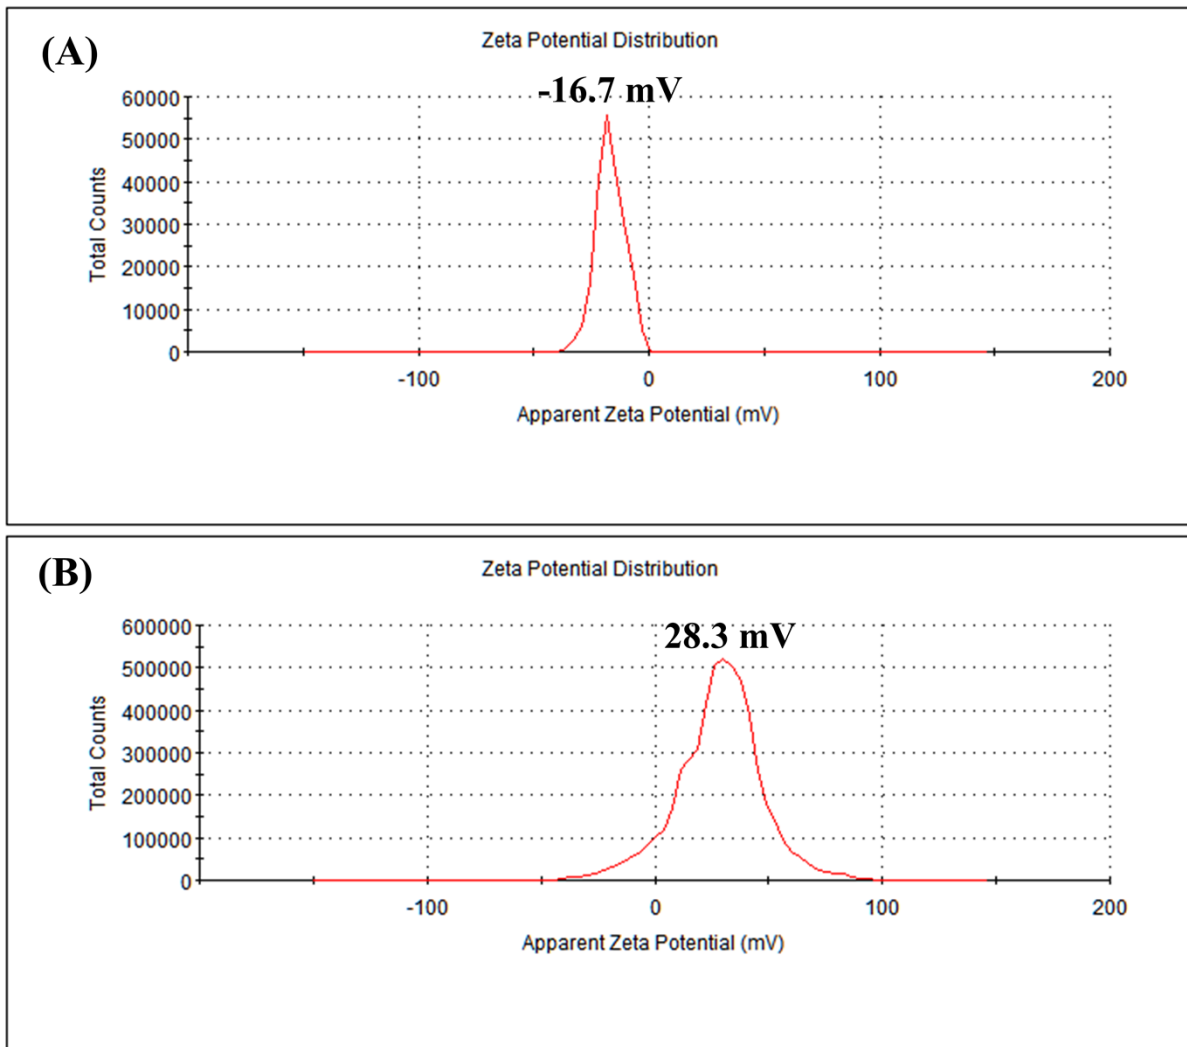

**Fig. S2** Surface charges of angle-shaped SPIONs synthesized (A) without b-PEI and (B) by adding b-PEI in D.W..

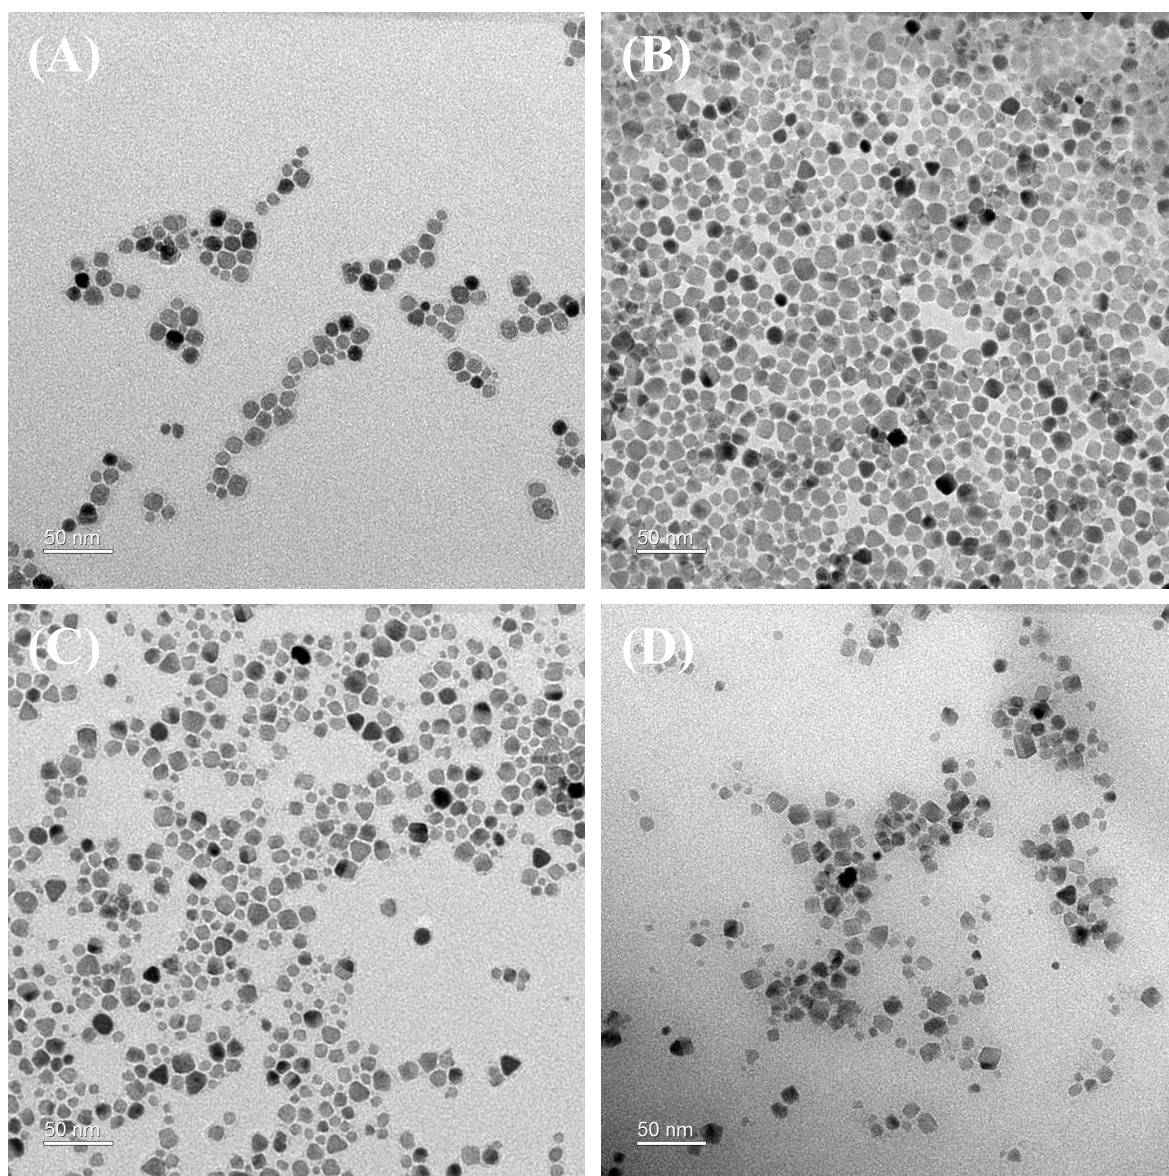

**Fig. S3** TEM images of angle-shaped SPIONs synthesized with (A) 20.8 mM, (B) 62.5 mM, (C) 83.3 mM, and (D) 333.3 mM KBr.

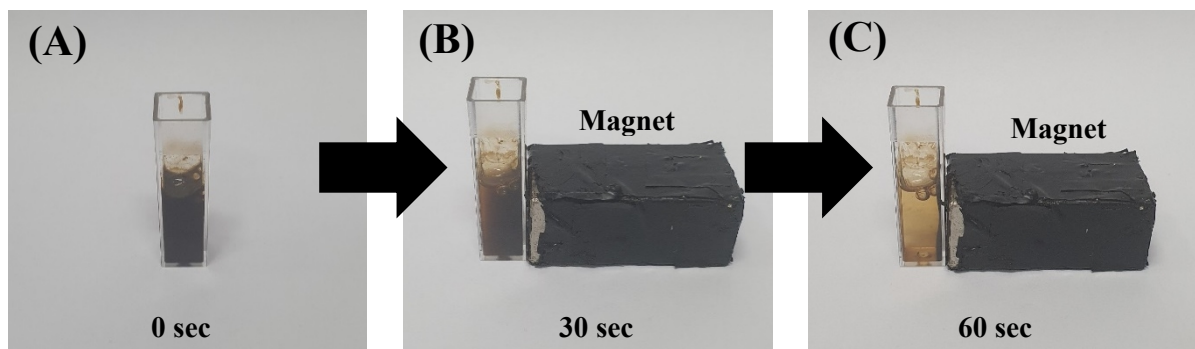

**Fig. S4** Photographs of the water suspension of angle-shaped SPIONs in magnetic field after (A) 0 sec, (B) 30 sec, and (C) 60 sec.

|                                                        |          |             |             |             |              |              |
|--------------------------------------------------------|----------|-------------|-------------|-------------|--------------|--------------|
| <b>Concentration of KBr (mM)</b>                       | <b>0</b> | <b>20.8</b> | <b>62.5</b> | <b>83.3</b> | <b>333.3</b> | <b>666.7</b> |
| <b>Specific absorption rate(SAR) (W/g)</b>             | 2.092    | 8.368       | 14.644      | 25.104      | 50.208       | 4.184        |
| <b>Intrinsic loss power(ILP) (nH*m<sup>2</sup>/kg)</b> | 0.0168   | 0.0671      | 0.1174      | 0.2012      | 0.4024       | 0.0335       |

**Fig. S5** Values of specific absorption rate and intrinsic loss force calculated using the initial slope of Fig. 5A.

· Specific absorption rate (SAR)

$$SAR = \frac{C_p}{m_{NP}} * \frac{\Delta T}{\Delta t} W/g$$

$$C_p = C_{water} = 4.184 J/g * K$$

$$m_{NP} = 0.02 g$$

$\Delta T/\Delta t =$  initial slope of delta temperature graph

· Intrinsic loss power (ILP)

$$ILP = \frac{SAR}{f * H^2} nH * m^2/kg$$

$$f = 100 kHz$$

$$H = 140 Oe = 11.17 kA/m$$

**(A) U87MG-GFP**

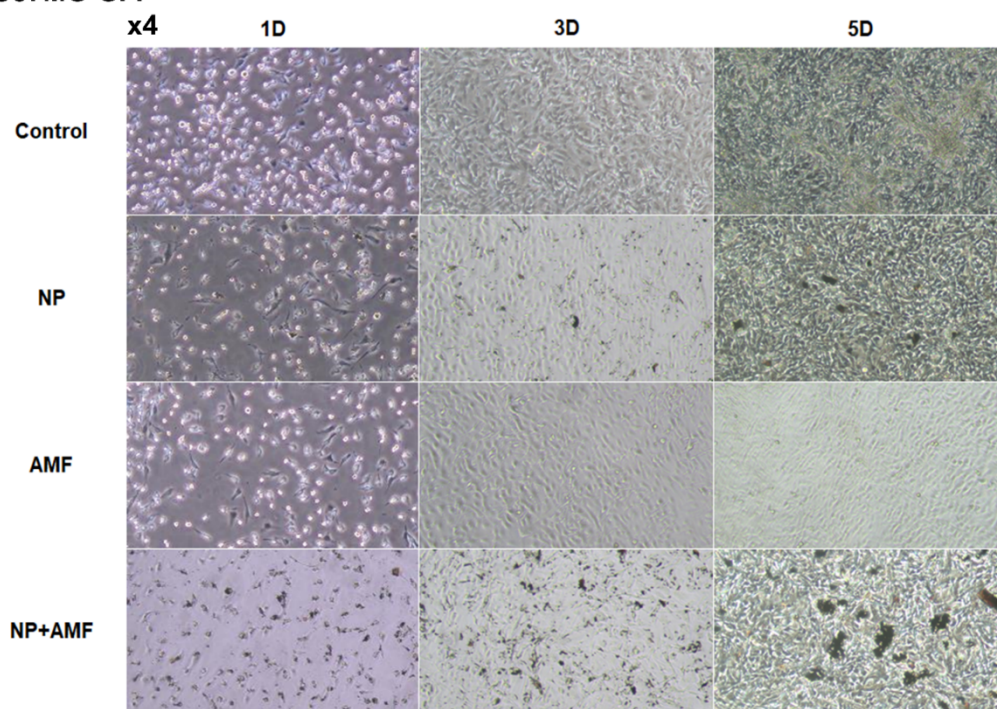

**(B) FSall-GFP**

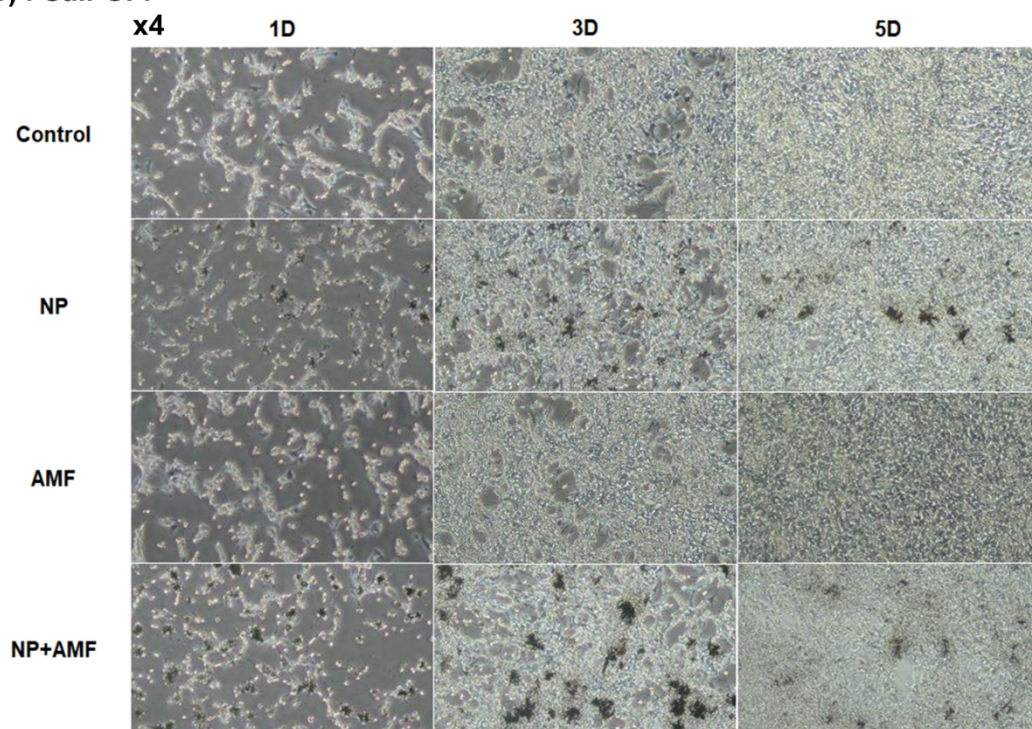

**Fig. S6** Cell images of cancer cell lines after magnetic hyperthermia. (A) is images of U87MG-GFP cell lines, and (B) is FSall-GFP cell lines. AMF and NP+AMF groups are applied 100 kHz, 140 Oe. NP and NP+AMF groups were added angle-shaped SPIONs (100  $\mu\text{g}/\text{mL}$ ) to the medium.
